# Supplementary material
Source: publisher figshare collection journal article supplement (https://tandf.figshare.com/articles/dataset/_/9976127)
Supplement: Supplementary file 3 [file 2]

Archive with 4 entries (4 files):
- iiht_a_953276_sm7867.pdf
- iiht_a_953276_sm7862.pdf
- iiht_a_953276_sm7861.pdf
- iiht_a_953276_sm7860.pdf
